# Supplementary material for: Intratumoral CD103+ CD8+ T cells predict response to PD-L1 blockade
Source: PubMed Central journal article supplement — J Immunother Cancer. 2021 Apr 7;9(4):e002231. doi: 10.1136/jitc-2020-002231 (PMC8032254; doi:10.1136/jitc-2020-002231), 2021-04-07
Supplement: jitc-2020-002231supp004.pdf [file jitc-2020-002231supp004.pdf]

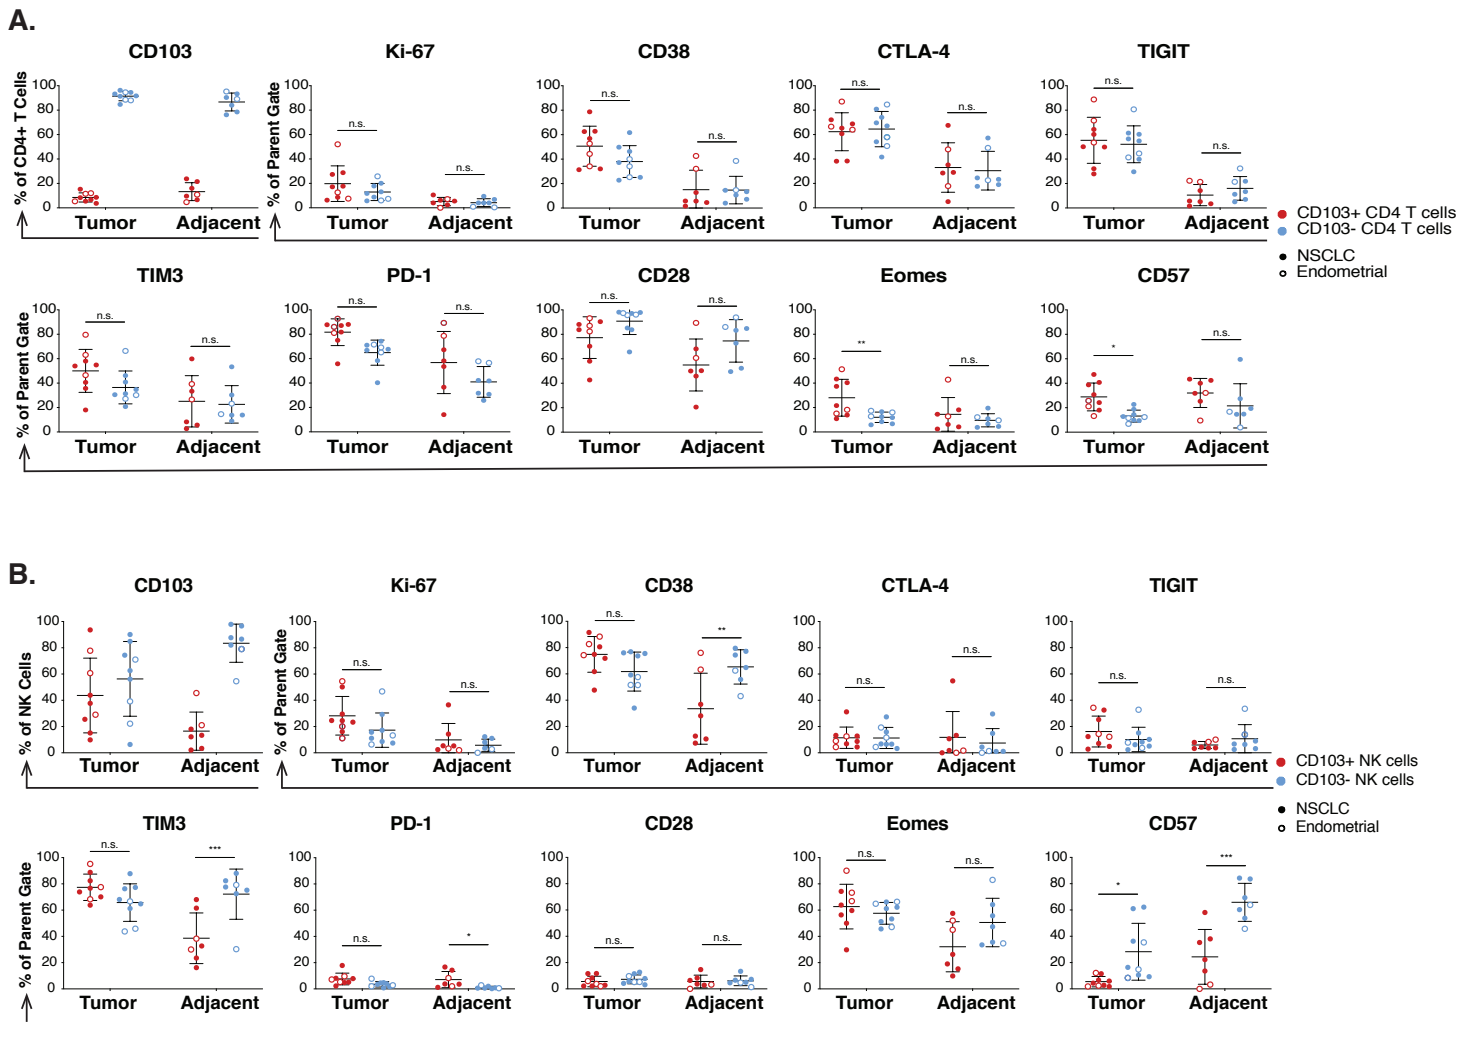

**Figure S2.** Comparison of CD103+ and CD103- CD4+ T cells and NK cells. (A) Frequency of positivity for indicated markers of proliferation, activation, and dysfunction between CD103+ (red) and CD103- (blue) subsets of CD4+ T cells in either tumor (left) or adjacent (right) tissues in NSCLC (closed circles) and Endometrial (open circles) tumors. (B) Parallel analysis as done in (A) for CD103+ (red) and CD103- (blue) subsets of NK cells. Statistical significance was determined using a Two-Way ANOVA with a Bonferroni Correction for multiple comparisons. \* $p < 0.05$ , \*\* $p < 0.01$ , \*\*\* $p < 0.001$ , \*\*\*\* $p < 0.0001$ , n.s.= not significant.
