# Supplementary material for: Intratumoral CD103+ CD8+ T cells predict response to PD-L1 blockade
Source: PubMed Central journal article supplement — J Immunother Cancer. 2021 Apr 7;9(4):e002231. doi: 10.1136/jitc-2020-002231 (PMC8032254; doi:10.1136/jitc-2020-002231), 2021-04-07
Supplement: jitc-2020-002231supp005.pdf [file jitc-2020-002231supp005.pdf]

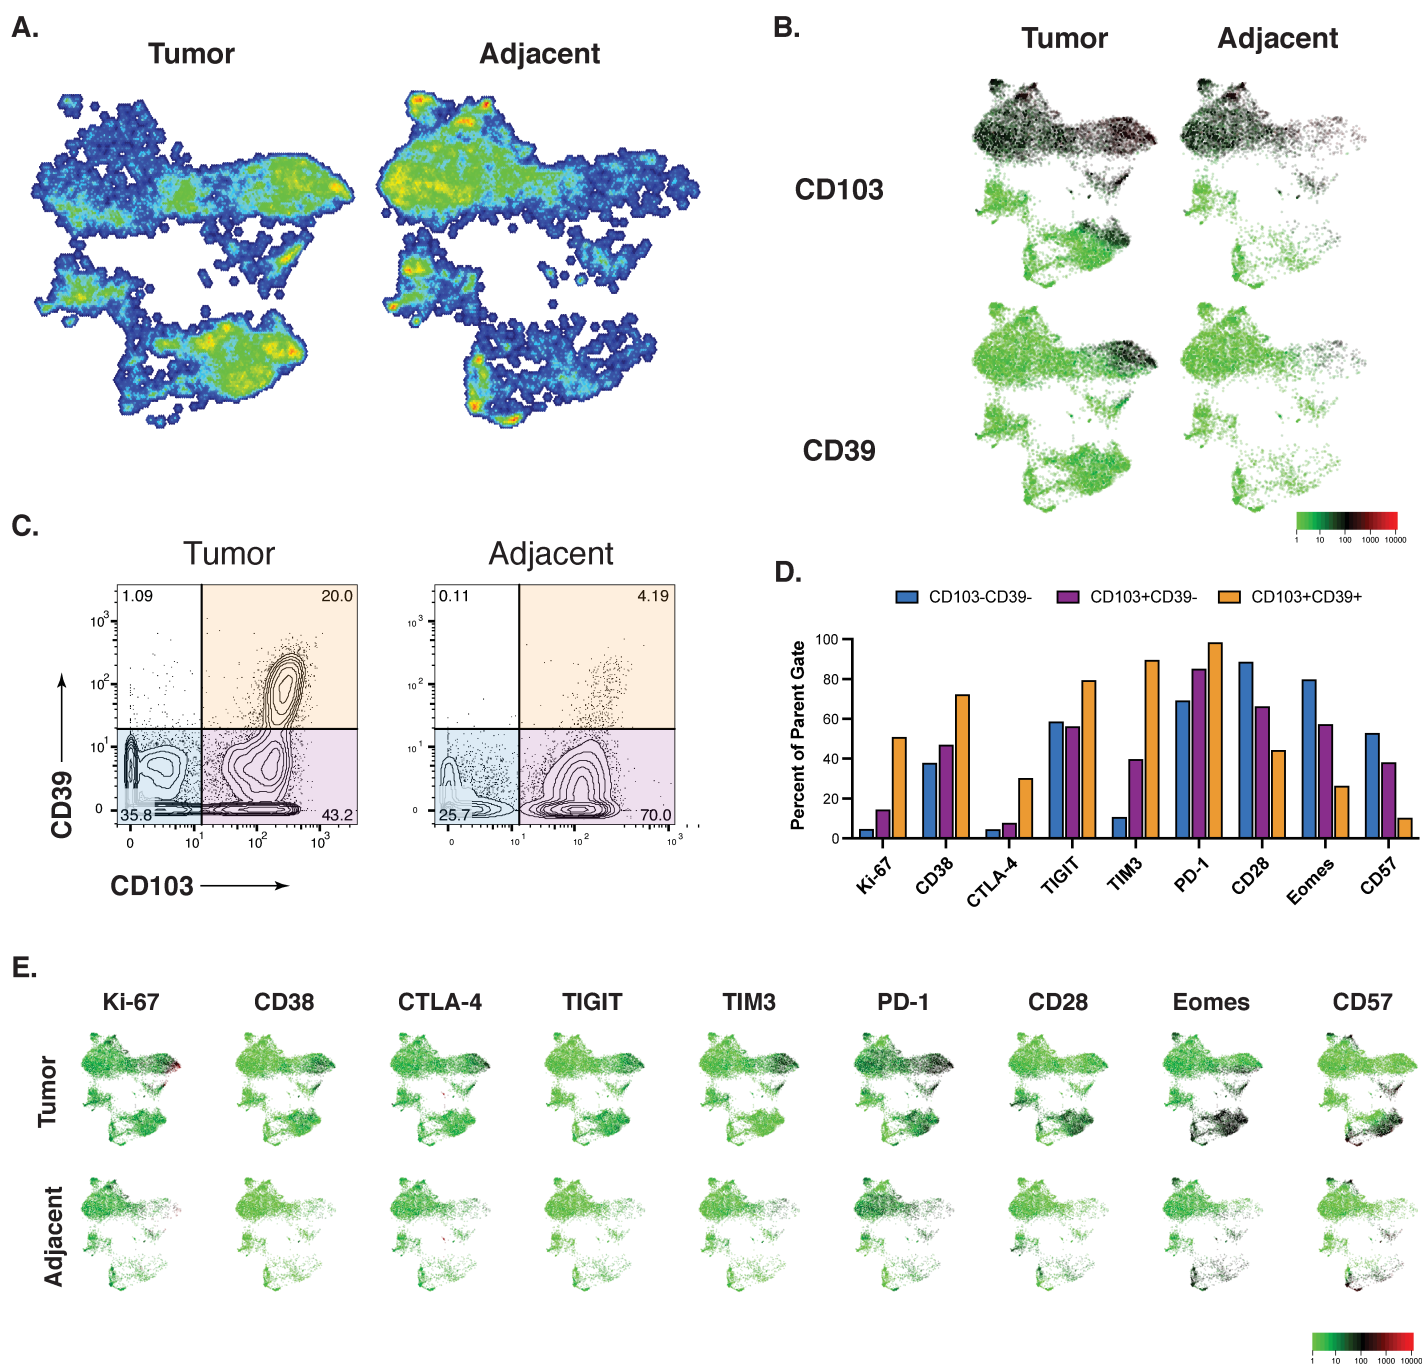

**Figure S3.** CD39 Further Enriches for Ki-67 and Immune Checkpoint Expression Within the CD103+ CD8+ Compartment. (A) CD8+ T cells from tumor and adjacent tissues from NSCLC (N=1, NSCLC6) were hand gated by manual analysis, merged, and clustered to generate a single UMAP. Data is displayed in a tissue-specific manner, with tumor (left) and adjacent (right) represented as individual UMAPs. (B) Expression of CD103 (top) and CD39 (bottom) overlaid onto the UMAP for CD8+ T cells shown in tumor (left) as well as non-diseased adjacent (right) tissues. (C) Bivariate plots depicting CD103 (x-axis) and CD39 (y-axis) within CD8+ T cells. (D) Percentage of cells expressing the indicated markers for double negative (blue), CD103 single-positive (purple), and CD103+CD39+ (orange) subpopulations. (E) Expression of indicated proteins overlaid onto the merged UMAP of CD8+ T cells from (A) for tumor (top) and adjacent (bottom) tissues.
