# Supplementary material for: Intratumoral CD103+ CD8+ T cells predict response to PD-L1 blockade
Source: PubMed Central journal article supplement — J Immunother Cancer. 2021 Apr 7;9(4):e002231. doi: 10.1136/jitc-2020-002231 (PMC8032254; doi:10.1136/jitc-2020-002231), 2021-04-07
Supplement: jitc-2020-002231supp007.pdf [file jitc-2020-002231supp007.pdf]

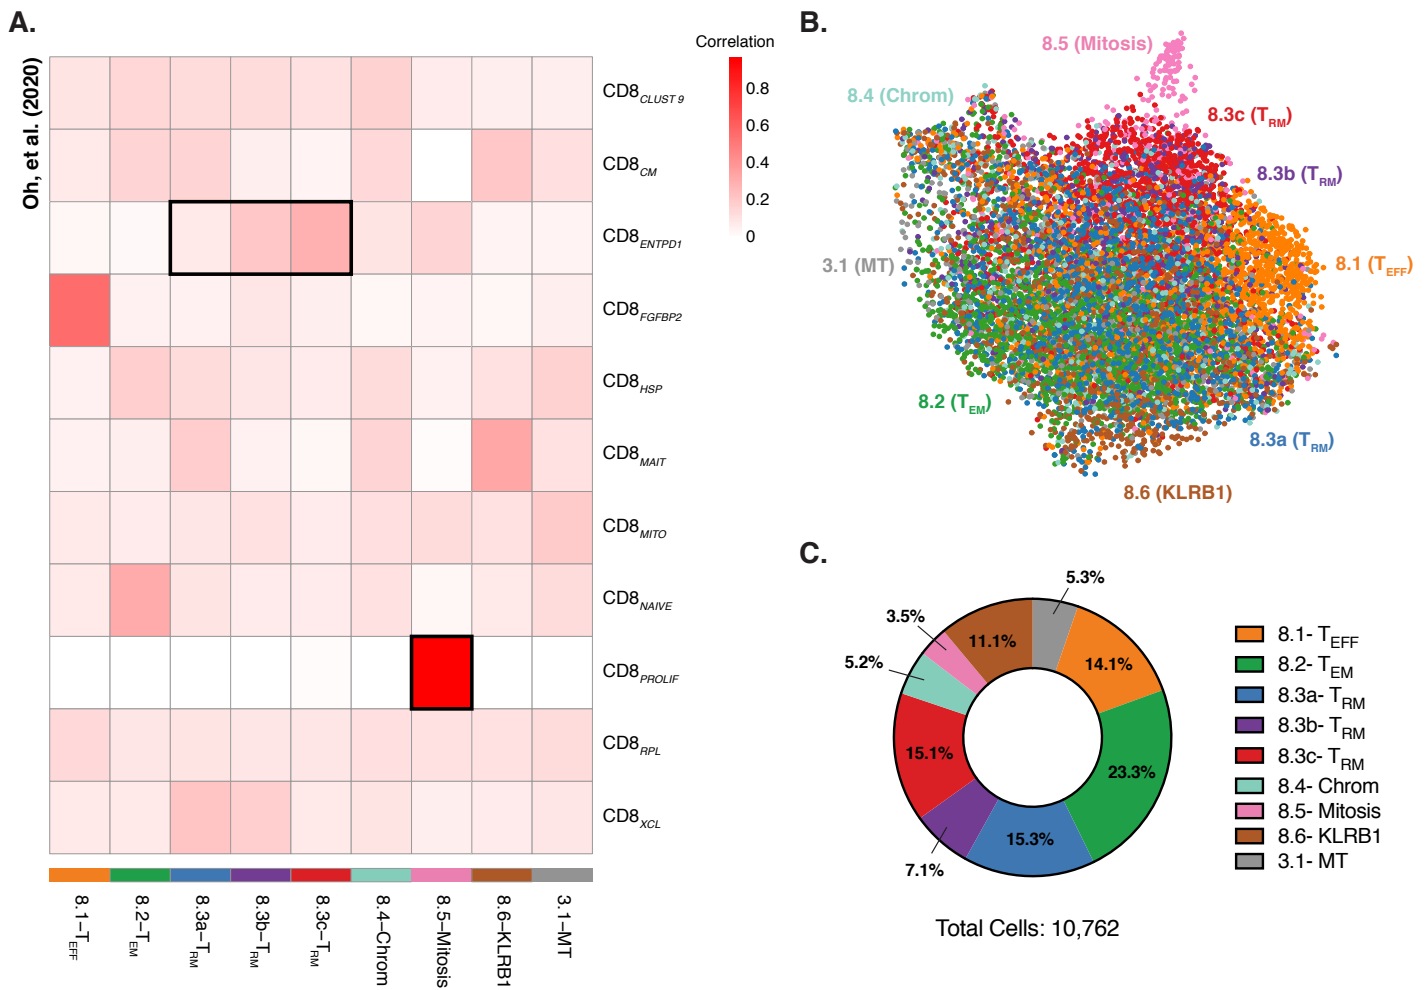

**Figure S5.** CD8+ T cell Phenotypes in the Bladder Tumor Microenvironment. (A) Heatmap depicting cross-referencing of CD8+ T cell cluster definitions from our dataset (x-axis) with those determined by Oh et al. (y-axis) in a bladder tumor dataset with color intensity indicating extent of correlation. (B) Cluster definitions, as determined by our analysis, projected onto the UMAP of CD8+ T cells in bladder tumors from Oh, et al. (C) Frequency of various indicated clusters in CD8+ T cells from bladder tumors.
